# Supplementary material for: Oncolytic virotherapy induced CSDE1 neo-antigenesis restricts VSV replication but can be targeted by immunotherapy
Source: PubMed Central journal article supplement (PMC7997928; doi:10.1038/s41467-021-22115-1), 2021-03-26
Supplement: 41467_2021_22115_MOESM1_ESM.pdf [file 41467_2021_22115_MOESM1_ESM.pdf]

SUPPLEMENTARY INFORMATION

**Oncolytic Virotherapy Induced CSDE1 Neo-antigenesis Restricts VSV Replication  
But Can Be Targeted By Immunotherapy**

## Supplementary Figure 1

Sanger sequencing shown beginning at position 7-14 in CSDE1

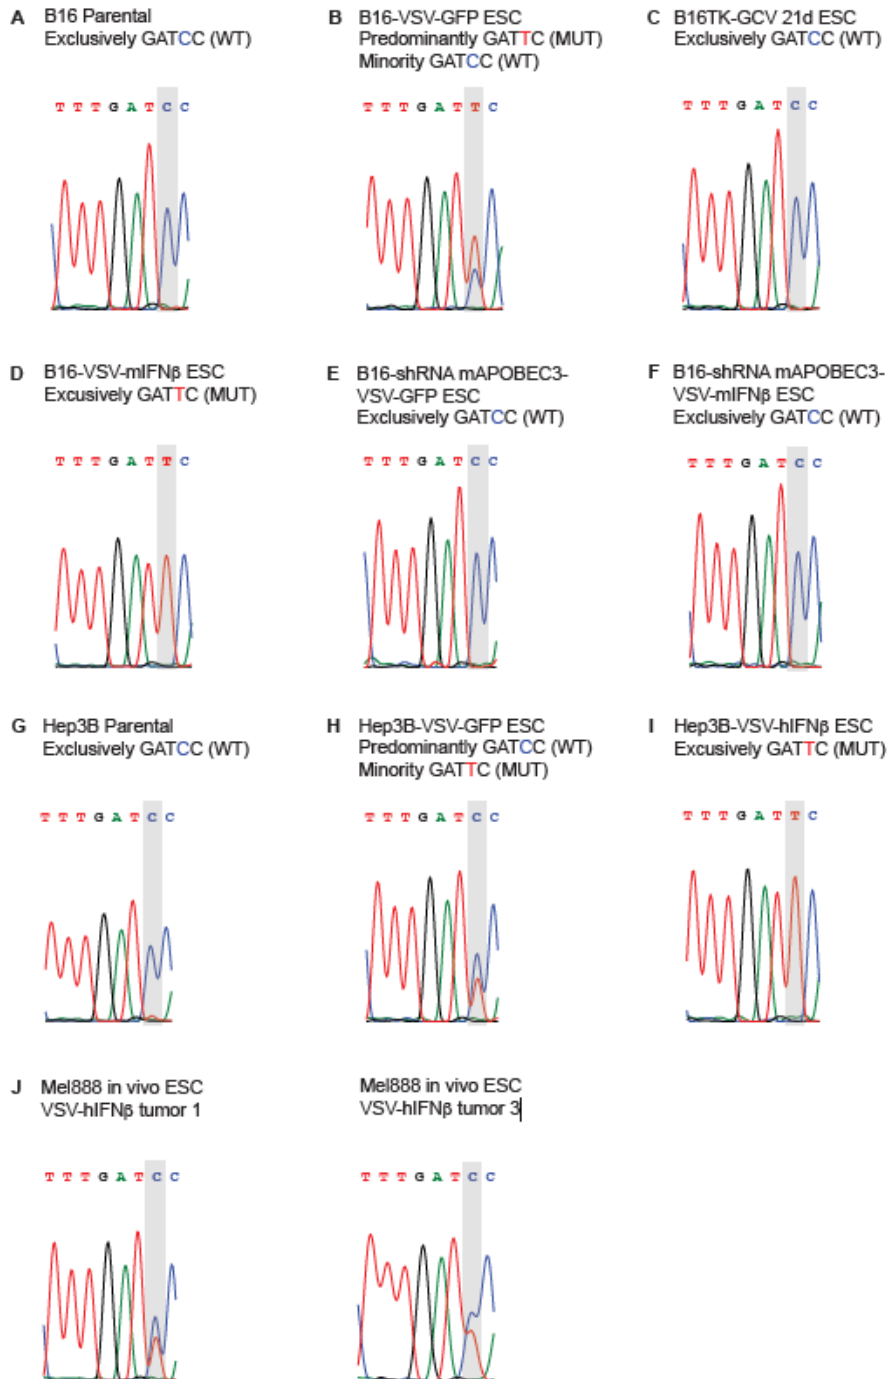

**Supplementary Figure 1. Escape from VSV-IFN- $\beta$  selects for the CSDE1<sup>C-T</sup> mutation.** B16 murine melanoma or Hep3B human HCC cells were infected (MOI 0.01) for 21d as in **Methods** and <sup>1</sup>. Surviving cells were pooled and genomic DNA prepared. Sanger sequencing of CSDE1 is shown for: **A.** Parental, uninfected B16 showing a homogenous population of wild type CSDE1 sequence; **B.** B16-VSV-GFP-ESC showing a mixed population of escape cells with either wild type ATCC or mutated ATTC sequence; **C.** B16 cells stably expressing the HSVtk suicide gene <sup>2</sup>, selected in GCV for 21d; **D.** B16-VSV-IFN $\beta$ -ESC showing a nearly homogenous population of escape cells with mutated ATTC sequence; **E&F.** B16 cells stably expressing shRNA against APOBEC3 as in <sup>1</sup> selected for escape from VSV-GFP (**E**) or VSV-IFN $\beta$  (**F**); **G.** Parental, uninfected Hep3B; **H.** Hep3B-VSV-GFP-ESC; and **I.** Hep3B-VSV-IFN $\beta$ -ESC. **J.** Nude mice bearing s.c. Mel888 human melanoma tumors treated with i.t. VSV-hIFN $\beta$  as described in <sup>1</sup> were excised upon escape from treatment, genomic DNA prepared and Sanger sequencing used to characterize the CSDE1 gene as shown. 4 of 4 excised, VSV-hIFN $\beta$ -escaped tumors had mixed populations of CSDE1<sup>WT</sup> and CSDE1<sup>C-T</sup> tumor cells at ratios close to 1:1. Results are representative of seven separate clones (**A-D**); 3 separate clones (**E,F**) and (**G-I**); and 4 separate escape tumors (**J**).

## Supplementary Figure 2

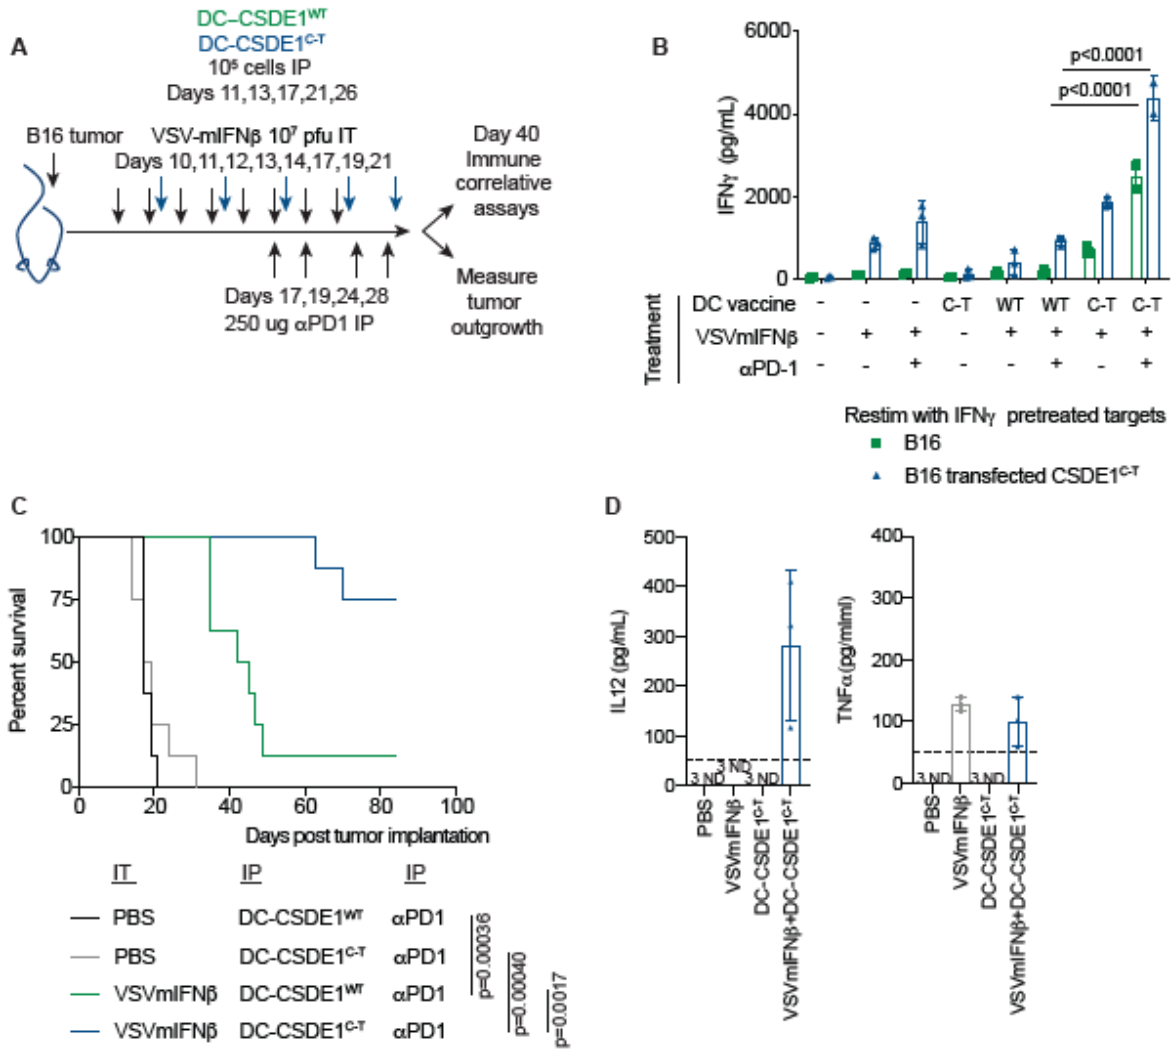

**Supplementary Figure 2. DC-CSDE1<sup>C-T</sup> vaccination.** **A.** *In vitro* IL-4/GM-CSF matured murine DC were transfected with nothing, CSDE1<sup>WT</sup> or CSDE1<sup>C-T</sup> expression plasmids and 48 hrs later administered as vaccines with i.t. treatments with VSV-mIFN- $\beta$  and  $\alpha$ -PD1. **B.** On d40, spleens and LN were assayed for IFN- $\gamma$  following *in vitro* re-stimulation with live B16 cells or with live B16 cells stably expressing CSDE1<sup>C-T</sup>. WT: DC vaccines expressing wild type CSDE1; \* DC vaccine expressing mutated CSDE1<sup>C-T</sup>. **C.** C57Bl/6 mice with 10d B16 tumors were injected i.t. with PBS or with VSV-mIFN $\beta$ , (10<sup>7</sup>pfu/injection) and i.p. with unloaded DC (DC), DC vaccine expressing wild type CSDE1 (DC-CSDE1<sup>WT</sup>) or with DC vaccine expressing mutated CSDE1<sup>C-T</sup> (CSDE1<sup>C-T</sup>) followed by  $\alpha$ -PD-1 (n=8/grp) as shown in **A**. Kaplan-Meier survival for groups is shown. Representative of two separate experiments. P-values were determined using the Log-rank Mantel Cox test. For multiple comparisons using the Bonferroni correction, overall statistical significance threshold was set at  $\alpha = 0.05$  (3 comparisons at p<0.0167). **D.** Mice were injected as in **A**. (3 mice/grp). 24hrs after the last injection of virus (d22), or earlier if tumor size excised 1.0cm diameter in the PBS groups, tumors were excised and assayed for IL-12 or TNF- $\alpha$  by ELISA (normalized by protein concentration in whole tumor cell lysates and expressed as pg/ml protein). Representative of two separate experiments. Each symbol in B,D represents a mouse (n=2 or 3/group). Means  $\pm$  SD are shown. ND, not detected (below limit of detection). P-values were determined using a two-way ANOVA (B) with a Tukey multiple comparisons post-test. Statistical significance set at p < 0.05 for B. Source data are provided as a Source Data file.

### Supplementary Figure 3

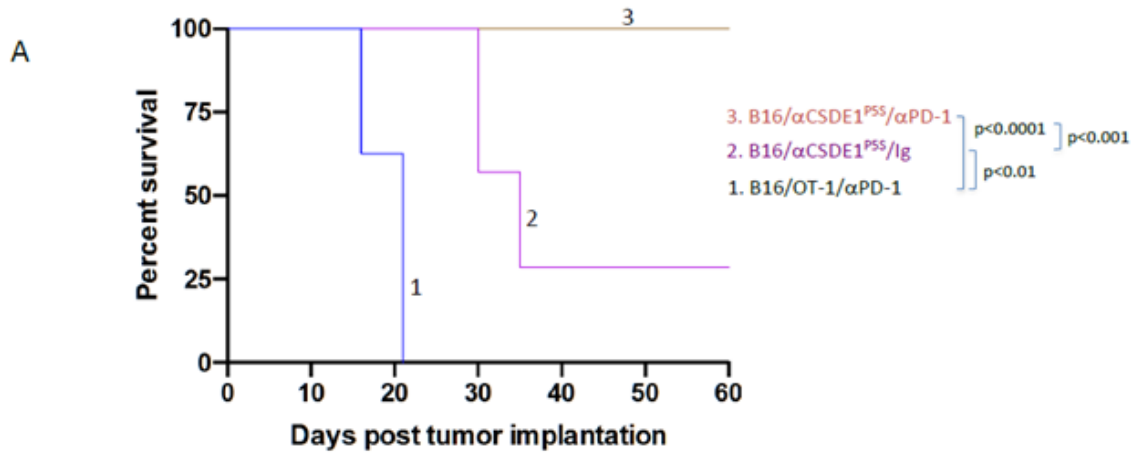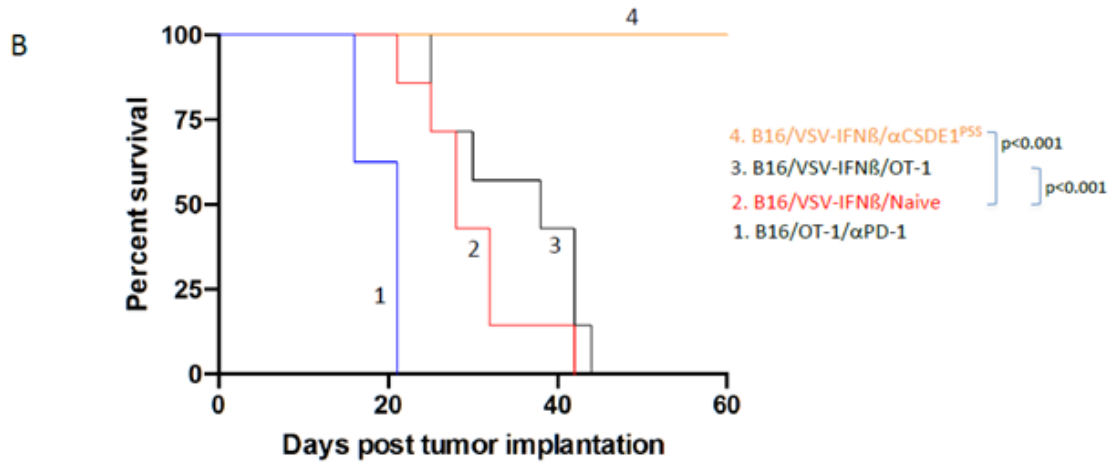

**Supplementary Figure 3:** C57Bl/6 mice with 10d established s.c. B16 tumors (7 mice/grp) were treated **A.** i.v. with  $2.5 \times 10^6$  OT-1 T cells activated *in vitro* for 5d with IL-2 (50 IU rhIL-2/ml) and SIINFEKL peptide (1 $\mu$ g/ml) (d10), and with anti-PD-1 antibody i.p. (300 $\mu$ g/injection) (d17,19,21); or with  $2.5 \times 10^6$  CD8+ T cells recovered from the spleens of mice which had rejected B16 tumors treated with VSV-CSDE1<sup>P5S</sup> (**Fig.5F**) and activated *in vitro* for 5d with IL-2 and the CSDE1<sup>P5S</sup> mutated peptide MSFDSNLLH (1 $\mu$ g/ml) (d10) either with, or without, anti-PD-1 antibody (d17,19,21). **B.** 3 additional groups were treated intratumorally with VSV-IFN- $\beta$  (d10,12,14) ( $5 \times 10^7$  pfu/injection) and subsequently with either CD8+ T cells from naïve C57Bl/6 mice (d17); *in vitro* activated OT-I CD8+ T cells; or *in vitro* activated anti-CSDE1<sup>P5S</sup> CD8+ T cells. Survival with time is shown. Data (A, B) from a single experiment not repeated. P-values were determined using the Log-rank Mantel Cox test. Source data are provided as a Source Data file.

### Supplementary References

- 1 Huff, A. L. *et al.* APOBEC3 Mediates Resistance to Oncolytic Viral Therapy. *Mol Ther Oncolytics* **11**, 1-13, doi:10.1016/j.omto.2018.08.003 (2018).
- 2 Evgin, L. *et al.* Suboptimal T-cell Therapy Drives a Tumor Cell Mutator Phenotype That Promotes Escape from First-Line Treatment. *Cancer Immunol Res* **7**, 828-840, doi:10.1158/2326-6066.CIR-18-0013 (2019).
